1 **Epigenetic changes induced by *Bacteroides fragilis* toxin (BFT)**

2

3 Jawara Allen<sup>1</sup>, Stephanie Hao<sup>2</sup>, Cynthia L. Sears<sup>1,3\*</sup>, Winston Timp<sup>2\*</sup>

4

5 1: Department of Medicine, Johns Hopkins University School of Medicine, Baltimore, MD, USA

6 2: Department of Biomedical Engineering, Johns Hopkins University School of Medicine,

7 Baltimore, MD USA

8 3: Bloomberg-Kimmel Institute for Immunotherapy and Department of Oncology, Sidney

9 Kimmel Comprehensive Cancer Center, Johns Hopkins Medicine Institutions, Baltimore, MD,

10 USA

11 \*Co-corresponding authors

12 Running head: BFT-induced Epigenetic changes

13 # Address correspondence to Cynthia L. Sears ([csears@jhmi.edu](mailto:csears@jhmi.edu)) or Winston Timp

14 ([wtimp@jhu.edu](mailto:wtimp@jhu.edu))

15

16 Cynthia L. Sears, M.D.

17 Johns Hopkins University School of Medicine

18 1550 Orleans Street

19 CRB2 Building, Suite 1M.05

20 Baltimore, MD 21231

21

22 Winston Timp

23 Johns Hopkins University

24 Department of Biomedical Engineering

25 3400 N. Charles St.

26 Clark 118A

27 Baltimore, MD 21218

28

1 Abstract (limit:250):

2

3 Enterotoxigenic *Bacteroides fragilis* (ETBF) is a gram negative, obligate anaerobe member of the  
4 gut microbial community in up to 40% of healthy individuals. This bacterium is found more  
5 frequently in people with colorectal cancer (CRC) and causes tumor formation in the distal  
6 colon of mice heterozygous for the adenomatous polyposis coli gene (*Apc*<sup>+/-</sup>); tumor formation  
7 is dependent on ETBF-secreted *Bacteroides fragilis* toxin (BFT). Though some of the immediate  
8 downstream effects of BFT on colon epithelial cells (CECs) are known, we still do not  
9 understand how this potent exotoxin causes changes in CECs that lead to tumor formation and  
10 growth. Because of the extensive data connecting alterations in the epigenome with tumor  
11 formation, initial experiments attempting to connect BFT-induced tumor formation with  
12 methylation in CECs have been performed, but the effect of BFT on other epigenetic processes,  
13 such as chromatin structure, remains unexplored. Here, the changes in chromatin accessibility  
14 (ATAC-seq) and gene expression (RNA-seq) induced by treatment of HT29/C1 cells with BFT for  
15 24 and 48 hours is examined. Our data show that several genes are differentially expressed  
16 after BFT treatment and these changes correlate with changes in chromatin accessibility. Also,  
17 sites of increased chromatin accessibility are associated with a lower frequency of common  
18 single nucleotide variants (SNVs) in CRC and with a higher frequency of common differentially  
19 methylated regions (DMRs) in CRC. These data provide insight into the mechanisms by which  
20 BFT induces tumor formation. Further understanding of how BFT impacts nuclear structure and  
21 function in vivo is needed.

22

1 Importance (limit:150):

2

3 Colorectal cancer (CRC) is a major public health concern; there were approximately 135,430  
4 new cases in 2017, and CRC is the second leading cause of cancer-related deaths for both men  
5 and women in the US (1). Many factors have been linked to CRC development, the most recent  
6 of which is the gut microbiome. Pre-clinical models support that enterotoxigenic *Bacteroides*  
7 *fragilis* (ETBF), among other bacteria, induce colon carcinogenesis. However, it remains unclear  
8 if the virulence determinants of any pro-carcinogenic colon bacterium induce DNA mutations or  
9 changes that initiate clonal CEC expansion. Using a reductionist model, we demonstrate that  
10 BFT rapidly alters chromatin structure and function consistent with capacity to contribute to  
11 CRC pathogenesis.

12

13 **Introduction** (limit for body: 5000)

14

15 *Bacteroides fragilis* is a gram-negative, obligate anaerobe that is found consistently, but in low  
16 numbers, in the gut microbial community (2). ETBF is a particular subtype of *Bacteroides*  
17 *fragilis*, characterized by its production of *Bacteroides fragilis* toxin (BFT) and its association  
18 with diarrhea, inflammatory bowel disease and colon cancer(3, 4). Since the identification of  
19 ETBF, many studies have examined the carriage rate of this potentially pathogenic bacterium.  
20 Some studies have probed the mucosa for the bacterium and found an asymptomatic carriage  
21 rate as high as 67% (4), but most studies examine the stool and report rates of 10%-12% (3).  
22 So, while we do not yet know exactly how many people are colonized with ETBF, it is clear that

1 a significant fraction of the population likely experiences prolonged exposure to the bacterium,  
2 and thus BFT.

3  
4 The *bft* gene codes for the BFT pre-pro-protein that is processed by ETBF, yielding a secreted  
5 active 20 kD zinc-dependent metalloprotease (3). There are three isotypes of the BFT protein,  
6 each produced by a different *bft* gene (3), with the most potent of the BFT isotypes being BFT2.  
7 Expression of BFT2 is required for ETBF-induced tumorigenesis in multiple intestinal neoplasia  
8 (*Apc<sup>min/+</sup>*) mice (5). When interacting with colon epithelial cells (CECs), BFT2 binds to an  
9 unidentified cell surface receptor which leads to rapid, but indirect, cleavage of E-cadherin that,  
10 in turn enhances barrier permeability *in vivo* (6). Because a pool of  $\beta$ -catenin is associated with  
11 the intracellular domain of E-cadherin, cleavage of E-cadherin triggers release of  $\beta$ -catenin and  
12 its subsequent nuclear localization with upregulation of c-Myc expression and enhanced cellular  
13 proliferation (7).

14  
15 Though we know some of the immediate downstream effects of BFT on CECs, we still do not  
16 understand how this potent exotoxin causes lasting changes in CECs that lead to tumor  
17 formation and growth. A possible explanation is an epigenetic progenitor model to cancer, in  
18 which epigenetic dysregulation enables tumor cell survival (8). Epigenetics is the study of  
19 heritable phenotypic variation that is not caused by base pair changes in the genome.  
20 Epigenetic changes have been linked to various cancers; in colorectal cancer specifically,  
21 hypermethylation of CpG islands and global hypomethylation have both been implicated in

1 tumor development and progression (9) and global dysregulation of the methylome has been  
2 observed in clinical colon cancer samples (10).  
3  
4 Initial experiments exploring the impact of BFT on the epigenome have been promising. By  
5 tracking the localization of specific epigenetic regulators, one study showed that inoculation of  
6 C57BL/6J mice with ETBF causes an upregulation of gene silencing complexes at CpG islands  
7 (11). Subsequent studies have shown that inoculation of *Apc<sup>min/+</sup>* mice with ETBF also causes  
8 recruitment of DNA methyltransferase 1 (DNMT1), a recruitment potentially mediated by DNA  
9 mismatch repair proteins (12). While these studies have established a role for gene regulation  
10 and DNA methylation in the effect of ETBF on CECs, studies do not report on how ETBF affects  
11 other epigenetic processes, such as chromatin structure. This is of particular importance  
12 because chromatin state as measured by changes in various histone marks has been linked to  
13 colon cancer development (9), and differences in chromatin structure have been shown to  
14 impact mutation rates along the genome (13)(14).  
15  
16 Herein, we further test the hypothesis that the epigenome is at least one mechanism by which  
17 BFT acts to increase colon tumor formation. To test our hypothesis, we use a reductionist  
18 model system to investigate the effect of BFT2 on CEC chromatin structure. Specifically, we  
19 examined whether BFT2 alters chromatin accessibility and subsequently, gene expression, using  
20 a model human colon epithelial cell line, HT29/C1, that is known to be uniformly sensitive to  
21 BFT2 and for which extensive prior data exist (3). We extended our analyses to seek to  
22 determine if BFT2-induced chromatin changes were associated with functional consequences

1 by correlation with transcription factor binding motifs and known cancer-causing mutations in  
2 human CRC.

3

#### 4 **Results**

5

#### 6 ***BFT2 induces dynamic changes in chromatin accessibility throughout the genome***

7

8 We initially examined time points of 24 and 48 hours after BFT treatment (fig 1A), performed in  
9 biological triplicate. To assay chromatin state, we performed ATAC-seq (Assay for Transposase-  
10 Accessible Chromatin using sequencing) on BFT2-treated and untreated cells at each time point  
11 (15). Briefly, ATAC-seq leverages the accessibility of chromatin to preferentially “attack” open  
12 chromatin using a transposase (Nextera; Illumina), resulting in a tagmentation reaction.  
13 Subsequent preferential amplification and downstream sequencing results in a distribution of  
14 sequencing reads which reveals areas of open versus closed chromatin by examination of the  
15 depth of coverage (i.e., the number of reads which align to each area of the genome). We  
16 utilized software tools like MACS2 (see Methods) to detect peaks in the coverage that indicate  
17 open chromatin regions.

18

19 We first quantified the total number of peaks of chromatin accessibility in our baseline samples  
20 (untreated cells) and BFT2-treated samples. We then classified these peaks into 2 types at 24  
21 and 48 hours: BFT2-opened peaks (peaks of chromatin accessibility detected only after BFT2  
22 treatment), and BFT2-closed peaks (peaks of chromatin accessibility that disappeared after

1 BFT2 treatment). This initial analysis revealed that only a fraction (40% at 24 hours and 35% at  
2 48 hours) of the peaks identified by ATAC-seq are affected by BFT2 treatment, and that BFT2  
3 treatment appears more likely to open chromatin than to close it (~11:3 ratio at 24 hours; ~5:3  
4 ratio at 48 hours) (fig 1B). We next analyzed the overlap of our BFT2-opened peaks and BFT2-  
5 closed peaks between 24 and 48 hours in order to determine if BFT2-induced changes in  
6 chromatin accessibility are stable. We found that only 13.4% (4989 peaks) of 24 hours and 48  
7 hours BFT2-opened peaks overlap, and 4.55% (743 peaks) of 24 hours and 48 hours BFT2-closed  
8 peaks overlap (fig 1B). These results emphasize the dynamic nature of BFT2-induced changes of  
9 chromatin accessibility.

10

11 To explore how BFT2 affects peak distribution throughout the genome, we performed a  
12 detailed analysis on the BFT2-opened and BFT2-closed chromatin regions (i.e. the regions of the  
13 genome affected by BFT2 treatment). When we analyze the distribution of these peaks, we see  
14 that more of BFT2-opened and BFT2-closed peaks are located within intergenic regions and  
15 coding regions than promoter regions (Table 1). To determine if this distribution was a  
16 byproduct of the ATAC-seq assay or a specific effect of BFT2, we compared those peak  
17 distributions to the distribution present in our baseline and BFT2-treated samples. This analysis  
18 reinforced that more of the BFT2-opened and BFT2-closed peaks are located within intergenic  
19 and coding regions, while less are located within promoter regions (Table 1). Although we  
20 expect that the effect in all three regions is important, these results suggest that chromatin  
21 accessibility is affected differentially across the genome by BFT2.

22

1 ***BFT2 treatment induces changes in gene expression that are more pronounced at 24 hours***  
2 ***than 48 hours***

3  
4 To examine the relationship between gene expression and chromatin state, we performed  
5 RNA-seq on the same samples used for ATAC-seq analysis. While the effect of BFT2 treatment  
6 on select genes at relatively early time points has been studied (16, 17), how this toxin affects  
7 genome wide expression and whether these effects persist is still unknown. After treatment  
8 with BFT2 for 24 hours, 70 genes were differentially expressed (P-value < 0.01). Of these genes,  
9 41 showed a decrease in gene expression, while 29 showed an increase in gene expression (fig  
10 2A, supplementary table 1). After BFT2 treatment for 48 hours, we found only 16 differentially  
11 expressed genes (P-value < 0.01); 3 showed a decrease in gene expression and 13 showed an  
12 increase in gene expression (fig 2B, supplementary table 2). This result follows a trend seen  
13 throughout our analyses and the literature (7, 16, 18) in which BFT2 has a more potent effect  
14 on CECs at 24 hours after toxin treatment that seems to diminish by 48 hours. A lineplot of the  
15 top 16 differentially expressed genes at 24 and 48 hours shows that gene expression at the two  
16 time points tends to differ; genes differentially expressed at 24 hours tend to move closer to  
17 baseline levels by 48 hours, while genes differentially expressed at 48 hours tend to have  
18 expression levels closer to baseline at 24 hours (supplementary fig 1). Notably, none of the  
19 genes differentially expressed at 24 hours show statistically significant differential expression at  
20 48 hours as well. These data reinforce the observation that BFT2-induced gene expression  
21 changes are highly dynamic, and time specific, similar to BFT2-induced changes in chromatin  
22 accessibility.



1  
2 To perform a Gene Set Enrichment (GSE) analysis on the list of genes that were differentially  
3 expressed at 24 hours and 48 hours after BFT2 treatment, the cutoff for significance was  
4 relaxed to a P-value of less than 0.05. The GSE analysis revealed several processes that were  
5 overrepresented in our list of upregulated and downregulated genes (fig 2c). Specifically, at 24  
6 hours after BFT2 treatment, expression of transcription factors involved in nucleic acid binding  
7 were downregulated. At 48 hours after BFT2 treatment, genes related to the cell cycle,  
8 chromosome organization and response to DNA damage, among others, were upregulated (fig  
9 2C).

10

11 ***Chromatin accessibility correlates with gene expression at baseline and at 24 hours after BFT2***  
12 ***treatment***

13

14 We next tested the hypothesis that BFT2-induced changes in chromatin accessibility correlate  
15 with BFT2-induced changes in gene expression. First, we classified genes by promoter  
16 chromatin accessibility status in our 24hr untreated (baseline) sample. Only promoter peaks  
17 were used because of the intuitive connection between open promoter chromatin and changes  
18 in gene expression. Those genes that contained an ATAC-seq peak overlapping their promoter  
19 region were categorized as “open” and those without a peak were categorized as “closed”. We  
20 then extracted normalized gene expression values (transcripts per million- TPM) for each of  
21 these genes to determine if the average gene expression values were different for the two  
22 groups. We found that on average, gene expression was statistically higher among genes that

1 were “open” in our 24hr baseline sample compared to those that were “closed” (P-value < 2e<sup>-</sup>  
2 <sup>16</sup>) (fig 3A).

3  
4 Next, we examined the correlation between changes in chromatin accessibility and changes in  
5 gene expression at the same time points. To do this, we again focused on BFT-opened and BFT-  
6 closed peaks which overlapped with gene promoter regions. We then calculated the  
7 logarithmic fold-change (Log2FC) expression values for each of these genes at 24 or 48 hours  
8 after BFT2 treatment. We found that genes with a BFT2-opened peak overlapping their  
9 promoter had a three-fold higher Log2FC in gene expression after 24 hours of BFT2 treatment  
10 than genes with a BFT2-closed peak at the same time point. At 48 hours after BFT2 treatment,  
11 we found no difference in Log2FC gene expression (fig 3 B-C). A similar analysis can be  
12 performed for the 86 genes that show statistically significant differences in gene expression  
13 after BFT2 treatment (fig 2 A-B, Supplementary tables 1, 2). Among those, 7 contained BFT2-  
14 opened peaks overlapping their promoter (6 at 24 hours and 1 at 48 hours). Of these genes, 5  
15 showed an increase in gene expression, while 2 showed a decrease. No BFT2-closed peaks  
16 overlapped with the promoters of these 86 genes at either time point (supplementary tables 1,  
17 2). Taken together, these results suggest that at 24 hours after BFT2 treatment, changes in  
18 chromatin structure largely correlate with changes in gene expression, but this relationship  
19 disappears by 48 hours.

20

21 ***Treatment with BFT2 causes increased chromatin accessibility at transcription factor binding***  
22 ***sites***

1  
2 Gene expression is regulated via multiple mechanisms, including the binding of transcription  
3 factors to enhancers and gene promoters. Therefore, we also wanted to test the hypothesis  
4 that BFT2-induced changes in chromatin accessibility impact transcription factor binding sites  
5 and thus gene expression. This can be done by looking for specific transcription factor motifs at  
6 sites of altered chromatin accessibility, or by calculating the overlap of sites of altered  
7 chromatin accessibility with sites of transcription factor binding. This latter approach is only  
8 available for a handful of transcription factors, such as CTCF, which have been extensively  
9 profiled via Chip-seq experiments in various cell types (19).

10  
11 We first used the haystack\_bio bioconda package to query our ATAC-seq data for specific  
12 transcription factor motifs. This analysis revealed several transcription factor motifs that are  
13 enriched in our BFT2-treated or baseline samples (Tables 2,3; Supplementary tables 5,6). In  
14 contrast to the BFT2-dependent dynamic chromatin changes identified in our earlier analyses  
15 (fig 1B, Table 1), many of the most enriched transcription factor motifs identified are present  
16 after both 24 and 48 hours of BFT2 treatment. Notably, these include JUND, JDP2, FOSL1, JUNB,  
17 FOS, FOS:JUN and ZBTB33, many of which are downstream of mitogen-activated protein kinase  
18 (MAPK) pathways previously shown to be modulated by BFT2 (18, 20, 21). In subsequent  
19 analyses, we specifically examined FOSL1, as it was the only transcription factor whose  
20 expression was upregulated 24 hours after BFT2 treatment. We noted that while several  
21 FOSL1-regulated genes were also upregulated after BFT2 treatment, a near equal proportion  
22 were also downregulated (supplementary tables 3,4). For FOSL1 to augment gene expression, it

1 needs to bind to an accessible DNA-binding site, so we next examined the FOSL1-regulated  
2 genes and classified them according to accessibility 24 hours after BFT2 treatment, as  
3 determined by ATAC-seq. We found that 6 of 7 genes with accessible DNA binding sites  
4 showed an increase in expression after BFT2 treatment, and only 1 of 6 genes without an  
5 accessible DNA binding site showed an increase in expression after BFT2 treatment  
6 (supplementary tables 3,4).

7  
8 While changes in promoter chromatin structure have been most extensively investigated, and  
9 provide many avenues for exploration, our data indicate that BFT2-induced changes in  
10 chromatin structure occur more frequently in intergenic regions. We hypothesized that these  
11 intergenic chromatin accessibility changes may affect chromatin architecture more globally and  
12 sites of CTCF binding specifically. CTCF is a DNA binding protein that regulates global chromatin  
13 structure by mediating chromatin looping via binding to and bringing together distant regions  
14 of the genome (19). The CTCF motif was enriched in our ATAC-seq data after 24 hours, but not  
15 48 hours, of BFT2 treatment (Tables 2, 3). To further investigate this enrichment, we calculated  
16 a jaccard index for the overlap of CTCF binding sites in CACO-2 cells and HT29/C1 cells (the  
17 latter using our ATAC-seq data); both cell lines are human transformed colon epithelial cell  
18 lines. We found that after 24 hours of BFT2 treatment, but not 48 hours, the HT29/C1/CACO-2  
19 jaccard index was increased by 1.13 fold (data not shown). These results again suggest that  
20 sites in the genome that show increases in chromatin accessibility after BFT2 treatment are  
21 more likely to also be sites of CTCF binding.

22

1 ***Chromatin accessibility is associated with differential DNA methylation and DNA mutation***

2

3 The previous analyses help us better understand how BFT2 alters chromatin accessibility in  
4 CECs and to connect chromatin changes with anticipated gene expression changes. However,  
5 they do not help us understand how changes in chromatin accessibility may contribute to  
6 common DNA-modifications found in CRC. To explore this, we looked for a correlation between  
7 BFT2-induced changes in chromatin accessibility and single nucleotide variants (SNVs) and  
8 common sites of differential methylation (DMRs) in CRC. SNVs and DMRs were extracted from  
9 the COSMIC database. We calculated the proportion of peaks in each sample that overlapped  
10 with a common SNV or DMR. We then used a chi-square test to compare our treated and  
11 untreated samples in order to determine if the proportion of peaks overlapping a SNV or DMR  
12 differed after treatment of HT29/C1 cells with BFT2.

13

14 Correlating our chromatin accessibility changes with SNVs in CRC allows us to explore the  
15 effects of BFT2-induced chromatin accessibility changes in coding regions of the genome, where  
16 specific chromatin structure states have been linked to decreased mutation rates in cancer (13).  
17 In contrast, examining DMRs allows us to explore whether BFT2-induced chromatin accessibility  
18 is associated with hypermethylation of CpG islands in promoter regions, or hypomethylation of  
19 short interspersed nucleotide elements (SINEs) or long interspersed nucleotide elements  
20 (LINEs) in intergenic regions.

21

1 Our SNV analysis revealed a smaller proportion of peaks overlapping with common SNVs in CRC  
2 24 hours [OR(95%CI): 0.819(0.794-0.844)] and 48 hours [OR(95%CI): 0.964(0.936-0.993)] after  
3 BFT2 treatment (Table 4). Similar to our prior data, the effect of BFT2 was more pronounced 24  
4 hours after cell treatment. Thus, contrary to our hypothesis, these data suggest that regions of  
5 the genome with BFT2-induced increases in chromatin accessibility are *less* likely to contain  
6 SNVs commonly found in CRC.

7  
8 In contrast, our DMR analysis found that a larger proportion of BFT2-induced chromatin  
9 accessibility peaks overlap with common DMRs in CRC 48 hours [OR(95%CI): 1.094(1.018-  
10 1.176)], but not 24 hours [OR(95% CI): 1.037(0.965-1.114)] after BFT2 treatment (Table 4). This  
11 result supports a commonly held paradigm that chromatin changes come first, followed by  
12 methylation changes (22). When we further parsed the data to analyze regions of  
13 hypermethylation and hypomethylation individually, the results differed slightly, but  
14 consistently showed a larger proportion of peaks overlapping with common DMRs in CRC after  
15 BFT2 treatment (Table 4). Thus, analysis of DMRS supported our hypothesis that BFT2-induced  
16 regions of increased chromatin accessibility are *more* likely to contain sites of differential  
17 methylation found in CRC.

## 18 19 **Discussion**

20  
21 Our data support that acute BFT2 treatment of colon epithelial cells (CECs) leads to rapid onset  
22 and dynamic, but limited changes in chromatin accessibility. These changes in chromatin

1 accessibility could be associated with BFT2-induced changes in gene expression. We observed  
2 changes in both chromatin accessibility and gene expression over a 48-hour period, with the  
3 strongest changes occurring at 24 hours, then relaxing to baseline by 48 hours. Our results  
4 corroborate previous observations about the acute onset of BFT2 action on epithelial cells in  
5 vitro and in vivo (7, 16, 18).

6

7 Our RNA-seq data identifies several genes and pathways that are differentially regulated after  
8 BFT2 treatment. The pathways identified, particularly at 48 hours, include those involved in the  
9 DNA damage response and cell cycle regulation, both germane to previously reported BFT-  
10 induced CEC changes in vitro and in vivo. Namely, BFT2 has been shown to induce DNA double  
11 strand breaks and modulate apoptosis *in vitro* (17, 20) and ETBF similarly induces DNA double  
12 strand breaks (16) as well as colon carcinogenesis *in vivo* (23). In addition, our study also  
13 identified several new genes that may explain how BFT2 contributes to tumorigenesis by  
14 allowing other bacteria to invade the mucus layer and bind to CECs. Specifically, BFT2 causes  
15 upregulation of CEACAM6 and MUC16, and downregulation of MUC2. CEACAM6 acts as a  
16 receptor for adherent-invasive *E.coli*, a particular strain of *E. coli* that has recently been  
17 implicated in the development/progression of CRC in individuals with FAP (24) and has  
18 previously been associated with sporadic CRC (25). MUC2, the major MUC protein present in  
19 human colonic mucus, is notably downregulated after BFT2 treatment, potentially contributing  
20 to mucus invasion by tumorigenic *E.coli*. The upregulation of MUC16, a particular MUC variant  
21 that is not normally expressed in the colon, may represent a compensatory mechanism (i.e., an

1 attempt to protect CECs after MUC2 downregulation). Collectively, these results may begin to  
2 explain how ETBF works with other bacteria to promote tumor formation and growth.  
3  
4 Several previous studies have shown that chromatin structure in gene promoter regions  
5 correlates with gene expression (26, 27). Our study took this a step further by showing that  
6 acute changes in chromatin accessibility correlate with acute changes in gene expression. 24  
7 hours after BFT2 treatment, increases in chromatin accessibility generally correlated with  
8 increases in gene expression while decreases in chromatin accessibility correlated with  
9 decreases in gene expression. On the other hand, at 48 hours, no significant association is seen  
10 between changes in chromatin accessibility and gene expression. This lack of association is  
11 likely due to the limited gene expression changes that remain 48 hours after BFT2 treatment  
12 and underscores a trend that is seen throughout most of our data whereby changes due to  
13 BFT2 treatment are greater 24 hours after treatment and approach baseline levels by 48 hours.  
14 This pattern is also corroborated by previous *in vitro* data that has shown that the effect of  
15 BFT2 on gene expression in CECs is rapid and appears to decay quickly (7, 16, 18), although  
16 biologic effects such as CEC proliferation persist for at least 72 hours *in vitro* (7).  
17  
18 Areas of increased chromatin accessibility after BFT2 treatment are enriched in binding motifs  
19 for many transcription factors belonging to the AP-1/ATF family of transcription factors,  
20 including FOSL1, JUN and JDP. These transcription factors function downstream of the JNK  
21 pathway known to be activated by BFT2 (18, 20, 21) . After BFT2 treatment, we expected to see  
22 increased expression of genes which are regulated by these particular transcription factors, but



1 chromatin opening alone appeared insufficient to drive changes in gene expression of these JNK  
2 pathway genes. Hence, we looked for transcription factors that had both an enriched binding  
3 motif and increased gene expression after BFT2 treatment. FOSL1 was the primary candidate  
4 revealed by our analysis. We found that though presence of a FOSL1 binding site alone was  
5 unable to predict differential gene expression after BFT2 treatment, when coupled to promoter  
6 chromatin accessibility, an excellent concordance with increased gene expression was detected.  
7 This finding exemplifies how integration of chromatin accessibility and gene expression data  
8 can be applied to understand how BFT2 acts on CECs. We needed to use both types of data to  
9 correctly surmise that transcription factor upregulation, enrichment of transcription factor  
10 binding motifs, and the presence of open chromatin in the promoter region all contribute to  
11 BFT2-induced gene regulation.

12

13 Because CRC usually results from a series of genetic mutations, and can be transformed by  
14 changes in methylation patterns, any potential interaction between BFT2, chromatin  
15 accessibility, and common SNVs/DMRs in CRC is important. Herein, we found a BFT2-induced  
16 *increase* in chromatin accessibility at sites of common DMRs in CRC and a *decrease* at sites of  
17 common SNVs in CRC. Increased methylation after inoculation of mice with ETBF has been  
18 suggested previously. Specifically, studies by O'Hagan and colleagues have shown that binding  
19 of DNMT1 (DNA methyltransferase 1) at promoters of low-expressing genes is upregulated  
20 after ETBF murine colonization (11). While this study implicates ETBF, and thus BFT, in DNA  
21 hypermethylation, no studies to date have explored the connection between BFT and  
22 hypomethylation. Our data suggest that BFT2-induced changes in chromatin accessibility may

1 have dual effects on chromatin methylation patterns (fig 4). We hypothesize that increased  
2 chromatin accessibility is, at least, one step critical to chromatin methylation pattern changes in  
3 response to BFT2. This is important because hypermethylation can lead to silencing of tumor  
4 suppressor genes and hypomethylation can lead to upregulation of transposable elements that  
5 may reintegrate into tumor suppressor or proto-oncogenes. In the future, bisulfite sequencing  
6 experiments can be conducted to definitively correlate sites of methylation change after BFT2  
7 treatment with sites of altered chromatin accessibility.

8  
9 Several experiments, conducted across a variety of species, have also shown that chromatin  
10 accessibility may be inversely correlated with rates of specific DNA mutations (28–30). One  
11 study in particular showed that DNase accessible euchromatin was protected from UV-induced  
12 DNA damage, while lamina-associated heterochromatin was more susceptible to damage (14).  
13 This study is of particular importance because it investigated carcinogenesis-related DNA  
14 damage. Our data suggest that BFT2-induced decreases in chromatin accessibility are  
15 correlated with frequently mutated areas, suggesting that BFT2-induced chromatin changes  
16 may increase the chances of mutations. Such a hypothesis would require significant further  
17 testing to determine its accuracy – this could be done by sequencing BFT2-treated and  
18 untreated cells in order to determine if BFT2 treatment increases the mutation rate. If so, sites  
19 of increased mutation frequency could be identified and correlated with sites of BFT2-induced  
20 chromatin accessibility change.

21

1 Our study has several limitations that provide avenues for future experiments. Most notably,  
2 our experiments were performed on HT29/C1 cells, a colon carcinoma cell line. These cells  
3 contain several mutations that may lead them to respond differently to BFT2 than normal CECs.  
4 As a result, these experiments should be confirmed in a primary cell culture system, or ideally,  
5 *in vivo* in a mouse model or from human samples with and without ETBF colonization. Our  
6 study, by design, was also performed over only an early time window. *In vitro* studies with BFT  
7 best mimic the earliest *in vivo* events whereby ETBF induces CEC changes and colitis by ~24  
8 hours after murine colonization (31). In contrast, the persistent CEC exposure to BFT afforded  
9 by chronic ETBF colonization *in vivo* cannot be reliably modeled *in vitro*, in part, because of CEC  
10 uptake and degradation of BFT (32). Thus, additional *in vivo* studies are warranted since ETBF  
11 murine colonization is persistent and associated with ongoing IL-17-dominant inflammation and  
12 CEC hyperplasia after one year in C57Bl/6 mice (31, 33). Ultimately, we want to know which  
13 BFT-induced chromatin and gene expression changes persist and contribute to tumor  
14 formation. Verifying these experiments in an *in vivo* system will help answer some of the  
15 questions proffered by these data.

16

17 The experiments reported herein provide additional insight into the effect of BFT2, a bacterial  
18 exotoxin linked to CRC pathogenesis, on CECs. We have identified new associations between  
19 BFT2-induced chromatin accessibility and gene expression changes, and also correlated these  
20 changes with previously published data on BFT2-induced signal transduction and DNA  
21 modifications that may contribute to tumor formation or growth. We need to better

1 understand how BFT2 affects the genome and epigenome of CECs to determine if  
2 asymptomatic carriers of ETBF are at increased risk for colon tumorigenesis.

3

4 Acknowledgements: This work was supported by the Bloomberg Philanthropies (CLS), National  
5 Institutes of Health R01CA179440 (CLS), the Johns Hopkins Department of Medicine (CLS), and  
6 Howard Hughes Medical Institute (JA)

7 All authors declare no completing interests.

8

9

10

11

## 12 Works Cited

13

14 1. National Cancer Institute NI of H. Cancer of the Colon and Rectum - Cancer Stat Facts.

15 2. Wexler HM. 2007. Bacteroides: The good, the bad, and the nitty-gritty. Clin Microbiol  
16 Rev.

17 3. Sears CL. 2009. Enterotoxigenic Bacteroides fragilis: A rogue among symbiotes. Clin  
18 Microbiol Rev.

19 4. Boleij A, Hechenbleikner EM, Goodwin AC, Badani R, Stein EM, Lazarev MG, Ellis B,  
20 Carroll KC, Albesiano E, Wick EC, Platz EA, Pardoll DM, Sears CL. 2015. The bacteroides  
21 fragilis toxin gene is prevalent in the colon mucosa of colorectal cancer patients. Clin  
22 Infect Dis 60:208–215.

- 1 5. Chung L, Thiele-Orberg E, Geis A. 2017. Bacteroides Fragilis Toxin Coordinates a Pro-  
2 Carcinogenic Inflammatory Cascade via Targeting of Colonic Epithelial Cells. Submitted.
- 3 6. Wu S, Lim KC, Huang J, Saidi RF, Sears CL. 1998. Bacteroides fragilis enterotoxin cleaves  
4 the zonula adherens protein, E-cadherin. Proc Natl Acad Sci U S A 95:14979–84.
- 5 7. Wu S, Morin PJ, Maouyo D, Sears CL. 2003. Bacteroides fragilis enterotoxin induces c-  
6 Myc expression and cellular proliferation. Gastroenterology 124:392–400.
- 7 8. Timp W, Feinberg AP. 2013. Cancer as a dysregulated epigenome allowing cellular  
8 growth advantage at the expense of the host. Nat Rev Cancer 13:497–510.
- 9 9. Esteller M. 2008. Epigenetics in Cancer. N Engl J Med 358:1148–1159.
- 10 10. Hansen KD, Timp W, Bravo HC, Sabunciyan S, Langmead B, McDonald OG, Wen B, Wu H,  
11 Liu Y, Diep D, Briem E, Zhang K, Irizarry RA, Feinberg AP. 2011. Increased methylation  
12 variation in epigenetic domains across cancer types. Nat Genet 43:768–775.
- 13 11. O’Hagan HM, Wang W, Sen S, DeStefano Shields C, Lee SS, Zhang YW, Clements EG, Cai Y,  
14 Van Neste L, Easwaran H, Casero RA, Sears CL, Baylin SB. 2011. Oxidative Damage Targets  
15 Complexes Containing DNA Methyltransferases, SIRT1, and Polycomb Members to  
16 Promoter CpG Islands. Cancer Cell 20:606–619.
- 17 12. Maiuri AR, Peng M, Sriramkumar S, Kamplain CM, DeStefano Shields CE, Sears CL,  
18 O’Hagan HM. 2017. Mismatch Repair Proteins Initiate Epigenetic Alterations during  
19 Inflammation-Driven Tumorigenesis. Cancer Res 77:3467–3478.
- 20 13. Schuster-Böckler B, Lehner B. 2012. Chromatin organization is a major influence on  
21 regional mutation rates in human cancer cells. Nature 488:504–507.
- 22 14. García-Nieto PE, Schwartz EK, King DA, Paulsen J, Collas P, Herrera RE, Morrison AJ. 2017.

- 1 Carcinogen susceptibility is regulated by genome architecture and predicts cancer  
2 mutagenesis. *EMBO J* e201796717.
- 3 15. Buenrostro JD, Giresi PG, Zaba LC, Chang HY, Greenleaf WJ. 2013. Transposition of native  
4 chromatin for fast and sensitive epigenomic profiling of open chromatin, DNA-binding  
5 proteins and nucleosome position. *Nat Methods* 10:1213–1218.
- 6 16. Goodwin AC, Destefano Shields CE, Wu S, Huso DL, Wu X, Murray-Stewart TR, Hacker-  
7 Prietz A, Rabizadeh S, Woster PM, Sears CL, Casero RA. 2011. Polyamine catabolism  
8 contributes to enterotoxigenic *Bacteroides fragilis*-induced colon tumorigenesis. *Proc*  
9 *Natl Acad Sci U S A* 108:15354–9.
- 10 17. Kim JM, Lee JY, Kim Y-J. 2008. Inhibition of apoptosis in *Bacteroides fragilis* enterotoxin-  
11 stimulated intestinal epithelial cells through the induction of c-IAP-2. *Eur J Immunol*  
12 38:2190–9.
- 13 18. Wu S, Powell J, Mathioudakis N, Kane S, Fernandez E, Sears CL. 2004. *Bacteroides fragilis*  
14 enterotoxin induces intestinal epithelial cell secretion of interleukin-8 through mitogen-  
15 activated protein kinases and a tyrosine kinase-regulated nuclear factor- $\kappa$ B pathway.  
16 *Infect Immun* 72:5832–5839.
- 17 19. Holwerda SJB, de Laat W. 2013. CTCF: the protein, the binding partners, the binding sites  
18 and their chromatin loops. *Philos Trans R Soc B Biol Sci* 368:20120369–20120369.
- 19 20. Ko SH, Rho DJ, Jeon JI, Kim YJ, Woo HA, Lee YK, Kim JM. 2016. *Bacteroides fragilis*  
20 enterotoxin upregulates heme oxygenase-1 in intestinal epithelial cells via a mitogen-  
21 activated protein kinase- and NF- $\kappa$ B-dependent pathway, leading to modulation of  
22 apoptosis. *Infect Immun* 84:2541–2554.

- 1 21. Hess J. 2004. AP-1 subunits: quarrel and harmony among siblings. *J Cell Sci* 117:5965–  
2 5973.
- 3 22. Flavahan WA, Gaskell E, Bernstein BE. 2017. Epigenetic plasticity and the hallmarks of  
4 cancer. *Science* 357:eaal2380.
- 5 23. Chung L, Thiele Orberg E, Geis AL, Chan JL, Fu K, DeStefano Shields CE, Dejea CM, Fathi P,  
6 Chen J, Finard BB, Tam AJ, McAllister F, Fan H, Wu X, Ganguly S, Lebid A, Metz P, Van  
7 Meerbeke SW, Huso DL, Wick EC, Pardoll DM, Wan F, Wu S, Sears CL, Housseau F. 2018.  
8 *Bacteroides fragilis* Toxin Coordinates a Pro-carcinogenic Inflammatory Cascade via  
9 Targeting of Colonic Epithelial Cells. *Cell Host Microbe* 23:203–214.e5.
- 10 24. Dejea CM, Fathi P, Craig JM, Boleij A, Taddese R, Geis AL, Wu X, DeStefano Shields CE,  
11 Hechenbleikner EM, Huso DL, Anders RA, Giardiello FM, Wick EC, Wang H, Wu S, Pardoll  
12 DM, Housseau F, Sears CL. 2018. Patients with familial adenomatous polyposis harbor  
13 colonic biofilms containing tumorigenic bacteria. *Science* 359:592–597.
- 14 25. Arthur JC, Perez-Chanona E, Mühlbauer M, Tomkovich S, Uronis JM, Fan T-J, Campbell BJ,  
15 Abujamel T, Dogan B, Rogers AB, Rhodes JM, Stintzi A, Simpson KW, Hansen JJ, Keku TO,  
16 Fodor A a, Jobin C. 2012. Intestinal inflammation targets cancer-inducing activity of the  
17 microbiota. *Science* (80- ) 338:120–3.
- 18 26. Ackermann AM, Wang Z, Schug J, Naji A, Kaestner KH. 2016. Integration of ATAC-seq and  
19 RNA-seq identifies human alpha cell and beta cell signature genes. *Mol Metab* 5:233–  
20 244.
- 21 27. Davie K, Jacobs J, Atkins M, Potier D, Christiaens V, Halder G, Aerts S. 2015. Discovery of  
22 transcription factors and regulatory regions driving in vivo tumor development by ATAC-

- 1 seq and FAIRE-seq open chromatin profiling. PLoS Genet 11:e1004994.
- 2 28. Prendergast JGD, Semple CAM. 2011. Widespread signatures of recent selection linked to  
3 nucleosome positioning in the human lineage. Genome Res 21:1777–1787.
- 4 29. Prendergast JG, Campbell H, Gilbert N, Dunlop MG, Bickmore WA, Semple CA. 2007.  
5 Chromatin structure and evolution in the human genome. BMC Evol Biol 7:72.
- 6 30. Chen X, Chen Z, Chen H, Su Z, Yang J, Lin F, Shi S, He X. 2012. Nucleosomes Suppress  
7 Spontaneous Mutations Base-Specifically in Eukaryotes. Science (80- ) 335:1235–1238.
- 8 31. Rhee K-J, Wu S, Wu X, Huso DL, Karim B, Franco AA, Rabizadeh S, Golub JE, Mathews LE,  
9 Shin J, Sartor RB, Golenbock D, Hamad AR, Gan CM, Housseau F, Sears CL. 2009.  
10 Induction of Persistent Colitis by a Human Commensal, Enterotoxigenic Bacteroides  
11 fragilis, in Wild-Type C57BL/6 Mice. Infect Immun 77:1708–1718.
- 12 32. Wu S, Shin J, Zhang G, Cohen M, Franco A, Sears CL. 2006. The Bacteroides fragilis toxin  
13 binds to a specific intestinal epithelial cell receptor. Infect Immun 74:5382–90.
- 14 33. Wick EC, Rabizadeh S, Albesiano E, Wu X, Wu S, Chan J, Rhee K-J, Ortega G, Huso DL,  
15 Pardoll D, Housseau F, Sears CL. 2014. Stat3 Activation in Murine Colitis Induced by  
16 Enterotoxigenic Bacteroides fragilis. Inflamm Bowel Dis 20:821–834.
- 17 34. Buenrostro JD, Wu B, Chang HY, Greenleaf WJ. 2015. ATAC-seq: A method for assaying  
18 chromatin accessibility genome-wide. Curr Protoc Mol Biol 2015:21.29.1-21.29.9.
- 19 35. Lee J, Christoforo G, Christoforo G, Foo C, Probert C, Kundaje A, Boley N, kohpangwei,  
20 Dacre M, Kim D. 2016. kundajelab/atac\_dnase\_pipelines: 0.3.3.
- 21 36. Langmead B, Salzberg SL. 2012. Fast gapped-read alignment with Bowtie 2. Nat Methods  
22 9:357–359.



- 1 37. Feng J, Liu T, Zhang Y. 2011. Using MACS to identify peaks from ChIP-seq data. *Curr*  
2 *Protoc Bioinforma* 1–14.
- 3 38. Zhu LJ, Gazin C, Lawson ND, Pagès H, Lin SM, Lapointe DS, Green MR. 2010.  
4 *ChIPpeakAnno: a Bioconductor package to annotate ChIP-seq and ChIP-chip data. BMC*  
5 *Bioinformatics* 11:237.
- 6 39. Pinello L, Xu J, Orkin SH, Yuan G-C. 2014. Analysis of chromatin-state plasticity identifies  
7 cell-type-specific regulators of H3K27me3 patterns. *Proc Natl Acad Sci* 111:E344–E353.
- 8 40. Haider S, Waggott D, Lalonde E, Fung C, Liu F-F, Boutros PC. 2016. A bedr way of genomic  
9 interval processing. *Source Code Biol Med* 11:14.
- 10 41. Bray NL, Pimentel H, Melsted P, Pachter L. 2016. Near-optimal probabilistic RNA-seq  
11 quantification. *Nat Biotechnol* 34:525–527.
- 12 42. Pimentel H, Bray NL, Puente S, Melsted P, Pachter L. 2017. Differential analysis of RNA-  
13 seq incorporating quantification uncertainty. *Nat Methods* 14:687–690.
- 14

## 1 **Figure Legends**

2

3 **Figure 1: BFT2 induces dynamic changes in chromatin accessibility.** A.) HT29/C1 cells were  
4 treated with BFT2 or left untreated for 24 or 48 hours. After each time point, DNA and RNA  
5 were isolated. DNA was used to perform ATAC-seq, a measure of genome-wide chromatin  
6 accessibility. RNA was used to perform RNA-seq, a measure of genome-wide gene expression.  
7 B.) Venn diagrams showing the overlap of areas of accessible chromatin in untreated cells  
8 (baseline) and BFT2-treated cells at 24 hours (top) and 48 hours (bottom). Areas of accessible  
9 chromatin detected after BFT2 treatment at 24 or 48 hours, but not in untreated cells, were  
10 categorized as “BFT2-opened” while areas of accessible chromatin detected in untreated cells,  
11 but not after BFT2 treatment, were categorized as “BFT2- closed.” Left and right Venn diagrams  
12 show the overlap of BFT2-opened (left) or BFT2-closed (right) regions of the genome at 24 and  
13 48 hours. For all Venn diagrams, the number of open peaks (chromatin accessible) detected and  
14 the percentage of those peaks in each sector of the Venn diagrams are shown. Also, labels  
15 (bold) at the top of each Venn diagram describe the entire circle, both overlapping and non-  
16 overlapping regions, for each experimental condition.

17

18 **Figure 2: The effects of BFT2 on gene expression are more pronounced 24 hours after**  
19 **treatment than 48 hours.** RNA-seq was performed on untreated cells and those treated with  
20 BFT2 in order to determine if BFT2 alters gene expression in HT29/C1 cells. A) Heatmap  
21 showing the change in gene expression at 24 hours after BFT2 treatment for those genes with  
22 P-values < 0.01. B) Heatmap showing the changes in gene expression at 48 hours after BFT2

1 treatment for those genes with P-values < 0.01. For both heatmaps, colors represent Log2FC  
2 (fold change) values of gene expression in BFT2-treated samples compared to gene expression  
3 in baseline samples. Full list of differentially expressed genes after BFT2 treatment are in  
4 supplementary tables 1 and 2. C.) Dotplot showing the output from a gene set enrichment  
5 analysis looking for gene ontology (GO) and reactome gene sets that are upregulated or  
6 downregulated at 24 or 48 hours after BFT2 treatment. Only gene sets with an FDR qval < 0.25  
7 are shown.

8

9 **Figure 3: Chromatin accessibility and gene expression correlate at baseline and 24 hours after**  
10 **BFT2 treatment.** A.) Stacked histogram showing the correlation between gene expression and  
11 chromatin accessibility at baseline. Genes were first sorted by the presence of a peak in their  
12 promoter in the 24hr baseline sample. Genes with a promoter peak were considered “open”  
13 while those without a peak were considered “closed.” Log transcripts per million (TPM) gene  
14 expression values were then extracted and compared. The P-value was calculated by comparing  
15 the gene expression of genes with a promoter peak to those without a promoter peak in the  
16 24hr baseline sample. B-C) MA plot analyzing gene expression change after BFT2 treatment at  
17 24 and 48 hours. Genes are colored according to the presence of a BFT2-opened peak or a  
18 BFT2-closed peak in their promoter region. The dotted lines represent a log2 fold change in  
19 expression of +/- 0.5. The P-values were calculated by comparing the fold change in gene  
20 expression for genes with a promoter BFT2-opened peak to those with a promoter BFT2-closed  
21 peak. For all graphs, P-values were calculated using the Wilcoxon rank sum test.

22

## 1 **Materials and Methods**

2

3 **Culture of HT-29/C1 cells:** HT29/C1 cells were cultured at 37°C and 10% CO<sub>2</sub>. Cells were plated  
4 at 20% confluency 4 days before addition of BFT2 toxin. At day 0, HT29/C1 cells were washed  
5 five times with PBS, placed in minimal media (DMEM) without FBS or Pen/Strep and toxin was  
6 added one time at a concentration of 100ng/ml. After toxin addition, cells were allowed to  
7 grow at 37°C and 10% CO<sub>2</sub> for 24 or 48 hours.

8

9 **ATAC-seq transposition reaction:** For all experiments, cell counts were obtained by trypsinizing  
10 cells in 0.5% trypsin for 10 minutes at 37°C and then counting using a hemocytometer. Non-  
11 trypsinized cells were then scraped and 50,000 cells were added to an Eppendorf tube. ATAC-  
12 seq was performed using the protocol outlined by Buenrostro et al. (2015). Briefly, cells were  
13 washed with 50uL cold 1x PBS buffer, then centrifuged at 500g for 5 minutes at 4°C. Cells were  
14 then resuspended in 50uL cold lysis buffer (10 mM Tris-HCl [pH 7.4], 10 mM NaCl, 3 mM MgCl<sub>2</sub>,  
15 0.1% IGEPAL CA-630), gently lysed to preserve cell nuclei, and centrifuged again at 500g for 10  
16 minutes at 4°C. Cells were then washed 3x with wash buffer (lysis buffer without igepal). After  
17 each wash, cells were centrifuged at 500g for 5 minutes at 4°C. Cell nuclei were then  
18 resuspended in the transposition reaction mix and incubated for 30 minutes at 37°C. DNA was  
19 purified using a Qiagen MinElute PCR Purification Kit and eluted in 10uL elution buffer. DNA  
20 was stored at -20°C until fragments were amplified via PCR.

1 **PCR amplification following transposition:** All of the DNA purified following transposition was  
2 PCR amplified. To do so, the following were combined in a 0.2mL PCR tube: 10uL transposed  
3 DNA, 10uL nuclease-free H<sub>2</sub>O, 2.5uL 25uM custom Nextera PCR primer 1, 2.5uL 25uM custom  
4 Nextera barcoded PCR primer 2, 25uL NEBNext high-fidelity 2x PCR master mix. The  
5 components were amplified as follows: 1 cycle of 72°C for 5 min, 98°C for 30 sec; 5 cycles of  
6 98°C for 10 sec, 63°C for 30 sec, 72°C for 1 min. After initial amplification, the number of  
7 additional cycles to run was determined using qPCR. For this, the following were combined in a  
8 0.2mL PCR tube: 5uL of previously PCR-amplified DNA, 4.5uL of nuclease-free H<sub>2</sub>O, 0.25uL of  
9 25uM custom Nextera PCR primer 1, 0.25uL of 25uM custom Nextera PCR primer 2, 5uL KAPA  
10 SYBR FAST qPCR master mix (2x) (total reaction 15 ul). The components were amplified as  
11 follows: 1 cycle of 98°C for 30 sec; 20 cycles of 98°C for 10 sec, 63°C for 30 sec, 72°C for 1 min.  
12 To calculate the number of additional cycles of PCR needed, linear R<sub>n</sub> versus cycle was plotted  
13 and the cycle number that corresponds with 1/3 of the maximum fluorescent intensity was  
14 determined. After the number of additional PCR cycles was determined, the remaining 45uL of  
15 PCR product was run as follows: 1 cycle of 98°C for 30 sec; N cycles (as determined via qPCR) of  
16 98°C for 10 sec 63°C for 30 sec, 72°C for 1 min. Finally, the amplified library was purified using  
17 0.9x Ampure beads at room temperature, and eluted in 20uL RNase-free H<sub>2</sub>O.

18  
19 **ATAC-seq data analysis:** The 4nM pooled ATAC-seq library was sequenced on an Illumina HiSeq  
20 using 50bp paired-end sequencing. For each sample, three biological replicates were  
21 sequenced. After sequencing, the data was analyzed using the pipeline developed by the  
22 Kundaje lab, as outlined on ENCODE (35). Briefly, reads were trimmed, aligned and filtered

1 using Bowtie2(36) and peaks were called using MACS2(37). The three replicate peak files were  
2 combined in order to create one consensus file for each treatment condition using an  
3 irreproducible discovery rate (IDR) threshold of 0.1. For all analyses, the “optimal set”  
4 consensus file was used. Peak files for samples before and after BFT2 treatment were then  
5 compared in order to create BFT2-opened peaks (peaks present after BFT2 treatment, but not  
6 before) and BFT2-closed peak (peaks present before BFT2 treatment, but not after) files at 24  
7 and 48 hours after treatment. The ChIPpeakAnno package was used to separate peaks into  
8 specific regions of the genome (promoter, coding, intergenic) (38). The ChIPpeakAnno package  
9 was also used to associate peaks located in promoter regions with their nearest downstream  
10 genes. The haystack\_bio package was used to identify transcription factor binding motifs (39).  
11 For this analysis, C-G correction was turned off. For both the 24 hours and 48 hours analyses,  
12 the BFT2-treated peak file was compared to the baseline peak file. A ratio greater than 1  
13 represents transcription factor binding motifs that are present more frequently in the BFT2-  
14 treated peak file, while a ratio of less than 1 represents transcription factor binding motifs that  
15 are present more frequently in the baseline peak file. The bedR package was used to calculate  
16 the jaccard index for the overlap between identified peaks in our dataset and CTCF binding  
17 peak data in Caco-2 cells, taken from the UCSC genome browser (40).

18

19 **RNA-seq assay:** Cells were washed once with PBS, collected using a cell scraper, and RNA was  
20 extracted from cells using the Qiagen RNeasy mini kit. After RNA extraction, the RNA pellet was  
21 flash frozen using 100% ethanol and dry ice. Samples were then stored at -80°C. For library  
22 preparation, samples were removed from storage, and mRNA was enriched using the NEBNext

1 Poly(A) mRNA Magnetic Isolation Module. Afterwards, a non-directional RNA-seq library was  
2 constructed using the NEBnext Ultra RNA Library Prep kit from Illumina. The 2nM pooled RNA-  
3 seq library was sequenced using the Illumina HiSeq. For one sample, 50bp paired-end  
4 sequencing was performed. For the other two samples, 50bp single-end sequencing was  
5 performed.

6

7 **RNA-seq data analysis:** After sequencing, Kallisto was used to perform pseudoalignment of the  
8 raw RNA-seq data (41). Then, Sleuth was used to quantify gene expression and perform  
9 differential expression analyses (42).

10

11 **Gene Set Enrichment Analysis:** Gene set enrichment analysis was performed using all genes  
12 with a P-value < 0.05 at 24 or 48 hours after BFT2 treatment. For this analysis, a ranklist was  
13 first created by sorting the differentially expressed genes using the following formula: sign of  
14 fold change  $\times$  inverse P-value. This created a rank ordered list with the most significantly  
15 upregulated genes at the top and the most significantly downregulated genes at the bottom.  
16 The GSEA Pre-ranked tool was then run, using 1000 permutations, a classic (instead of  
17 weighted) analysis, a minimum gene set size of 15 and a maximum gene set size of 1500. The  
18 output of this analysis was then converted into graphical and tabular formats.

19

20 **Statistics:** To calculate the correlation between chromatin accessibility (ATAC-seq) and gene  
21 expression (RNA-seq) at baseline and after BFT2 treatment, the Wilcoxon Rank Sum test was  
22 used with an alpha of 0.05. To calculate the enrichment of transcription factor binding motifs in

- 1 BFT2-treated and untreated samples, a Fisher's exact test with an alpha of 0.01 was used. To
- 2 determine if there was a correlation between the location of BFT2-treated peaks and common
- 3 SNVs and DMRs in CRC, a chi-square test with an alpha of 0.05 was used in which BFT2-treated
- 4 peak files were compared to baseline peak files.



1 Table 1: Distribution of ATAC-seq peaks throughout the genome

|                                        | <b>24hr<br/>Baseline<br/>(48,982)<sup>a</sup></b> | <b>24hr<br/>BFT2<br/>(69,415)</b> | <b>48hr<br/>Baseline<br/>(58,147)</b> | <b>48hr<br/>BFT2<br/>(66,945)</b> | <b>24hr<br/>BFT2-<br/>Opened<br/>(24,967)</b> | <b>24hr<br/>BFT2-<br/>Closed<br/>(6,754)</b> | <b>48hr<br/>BFT2-<br/>Opened<br/>(17,459)</b> | <b>48hr<br/>BFT2-<br/>Closed<br/>(10,417)</b> |
|----------------------------------------|---------------------------------------------------|-----------------------------------|---------------------------------------|-----------------------------------|-----------------------------------------------|----------------------------------------------|-----------------------------------------------|-----------------------------------------------|
| <b>Promoter<br/>(0.5%)<sup>b</sup></b> | 41.6%                                             | 33.7%                             | 37.9%                                 | 34.9%                             | 17.4%                                         | 18.2%                                        | 16.0%                                         | 16.7%                                         |
| <b>Coding<br/>(44.3%)</b>              | 26.8%                                             | 31.5%                             | 28.7%                                 | 30.7%                             | 40.2%                                         | 37.4%                                        | 41.1%                                         | 39.4%                                         |
| <b>Intergenic<br/>(55.0%)</b>          | 31.6%                                             | 34.8%                             | 33.4%                                 | 34.4%                             | 42.4%                                         | 44.4%                                        | 42.9%                                         | 43.9%                                         |

The coding region includes 5' UTR, introns and exons

<sup>a</sup> Number of peaks per sample in parentheses

<sup>b</sup> Percent of the human genome represented by each region in parentheses

2

1 Table 2: Transcription factor binding motifs enriched after cell treatment with BFT2 for 24 hours

| <b>Motif Name</b>       | <b>Presence in target</b> | <b>Presence in background</b> | <b>Ratio</b> | <b>P-value</b> |
|-------------------------|---------------------------|-------------------------------|--------------|----------------|
| <b>JUNB</b>             | 12.68%                    | 10.17%                        | 1.22         | 1.90E-40       |
| <b>FOS</b>              | 12.40%                    | 9.97%                         | 1.22         | 8.14E-39       |
| <b>JUN(var.2)</b>       | 12.89%                    | 10.43%                        | 1.22         | 1.71E-38       |
| <b>JUND</b>             | 11.97%                    | 9.59%                         | 1.22         | 2.45E-38       |
| <b>FOSL1</b>            | 12.50%                    | 10.09%                        | 1.22         | 1.27E-37       |
| <b>FOS::JUN</b>         | 12.11%                    | 9.75%                         | 1.22         | 2.74E-37       |
| <b>JDP2</b>             | 10.17%                    | 8.01%                         | 1.24         | 8.26E-37       |
| <b>BATF::JUN</b>        | 10.91%                    | 8.82%                         | 1.21         | 2.48E-32       |
| <b>NFE2</b>             | 10.47%                    | 8.43%                         | 1.22         | 7.61E-32       |
| <b>ZBTB33</b>           | 12.90%                    | 15.27%                        | 0.85         | 4.76E-31       |
| <b><sup>a</sup>CTCF</b> | 37.76%                    | 36.92%                        | 1.02         | 3.38E-03       |

Only top 10 motifs are shown. Full list in supplementary table 5

P-values calculated using Fisher's exact test

Ratio < 1.0 represents enrichment in baseline sample

<sup>a</sup>included due to physiological relevance

2

1 Table 3: Transcription factor binding motifs enriched after cell treatment with BFT2 for 48 hours

| <b>Motif Name</b> | <b>Presence in target</b> | <b>Presence in background</b> | <b>Ratio</b> | <b>P-value</b> |
|-------------------|---------------------------|-------------------------------|--------------|----------------|
| <b>ZBTB33</b>     | 13.59%                    | 14.79%                        | 0.92         | 1.84E-09       |
| <b>FOS</b>        | 11.26%                    | 10.26%                        | 1.09         | 1.49E-08       |
| <b>JUNB</b>       | 11.43%                    | 10.43%                        | 1.09         | 1.51E-08       |
| <b>JUND</b>       | 10.78%                    | 9.82%                         | 1.09         | 2.32E-08       |
| <b>FOS::JUN</b>   | 10.95%                    | 10.01%                        | 1.09         | 7.19E-08       |
| <b>JDP2</b>       | 9.20%                     | 8.34%                         | 1.09         | 7.80E-08       |
| <b>FOSL1</b>      | 11.27%                    | 10.35%                        | 1.08         | 1.60E-07       |
| <b>E2F4</b>       | 21.39%                    | 22.60%                        | 0.95         | 2.60E-07       |
| <b>JUN(var.2)</b> | 11.70%                    | 10.82%                        | 1.07         | 1.06E-06       |
| <b>NFE2</b>       | 9.60%                     | 8.80%                         | 1.08         | 1.21E-06       |

Only top 10 motifs are shown. Full list in supplementary table 5  
P-values calculated using Fisher's exact test  
Ratio < 1.0 represents enrichment in baseline sample

2

1 Table 4: Association between BFT2-induced chromatin accessibility changes and common Single  
 2 Nucleotide Variants (SNVs)/Differentially Methylated Regions (DMRs) in CRC  
 3

|                             | Number of overlapping peaks | Number of non-overlapping peaks | Total number of peaks | Odds <sup>a</sup> | Odds ratio <sup>b</sup> (95% CI <sup>c</sup> ) |
|-----------------------------|-----------------------------|---------------------------------|-----------------------|-------------------|------------------------------------------------|
| <b>SNVs</b>                 |                             |                                 |                       |                   |                                                |
| <b>24hr BFT2</b>            | 11063                       | 58352                           | 69415                 | .0281             | 0.818 (0.794-0.844)                            |
| <b>24hr Baseline</b>        | 9210                        | 39772                           | 48982                 | .0271             |                                                |
| <b>48hr BFT2</b>            | 11147                       | 55798                           | 66945                 | .0259             | 0.964 (0.936-0.993)                            |
| <b>48hr Baseline</b>        | 9981                        | 48166                           | 58147                 | .0237             |                                                |
| <b>DMRs</b>                 |                             |                                 |                       |                   |                                                |
| <b>24hr BFT2</b>            | 1900                        | 67515                           | 69415                 | .0281             | 1.037 (0.965-1.114)                            |
| <b>24hr Baseline</b>        | 1294                        | 47688                           | 48982                 | .0271             |                                                |
| <b>48hr BFT2</b>            | 1692                        | 65253                           | 66945                 | .0259             | 1.094 (1.018-1.177)                            |
| <b>48hr Baseline</b>        | 1346                        | 56801                           | 58147                 | .0237             |                                                |
| <b>DMRs hypermethylated</b> |                             |                                 |                       |                   |                                                |
| <b>24hr BFT2</b>            | 944                         | 68471                           | 69415                 | .0138             | 0.979 (0.887-1.082)                            |
| <b>24hr Baseline</b>        | 680                         | 48302                           | 48982                 | .0141             |                                                |
| <b>48hr BFT2</b>            | 953                         | 65992                           | 66945                 | .0144             | 1.101 (1.000-1.212)                            |
| <b>48hr Baseline</b>        | 753                         | 57394                           | 58147                 | .0131             |                                                |
| <b>DMRs hypomethylated</b>  |                             |                                 |                       |                   |                                                |
| <b>24hr BFT2</b>            | 993                         | 68422                           | 69415                 | .0145             | 1.112 (1.006-1.230)                            |
| <b>24hr Baseline</b>        | 631                         | 48351                           | 48982                 | .0131             |                                                |
| <b>48hr BFT2</b>            | 757                         | 66188                           | 66945                 | .0114             | 1.081 (0.971-1.203)                            |
| <b>48hr Baseline</b>        | 609                         | 57538                           | 58147                 | .0106             |                                                |

<sup>a</sup>Odds represent the number of overlapping peaks divided by the number of non-overlapping peaks

<sup>b</sup>Odds ratios represent the odds in BFT2-treated cells divided by the odds in untreated cells

<sup>c</sup>95% confidence intervals were calculated using a chi-square test

Common DMRs and SNVs in CRC were extracted from the COSMIC database

4

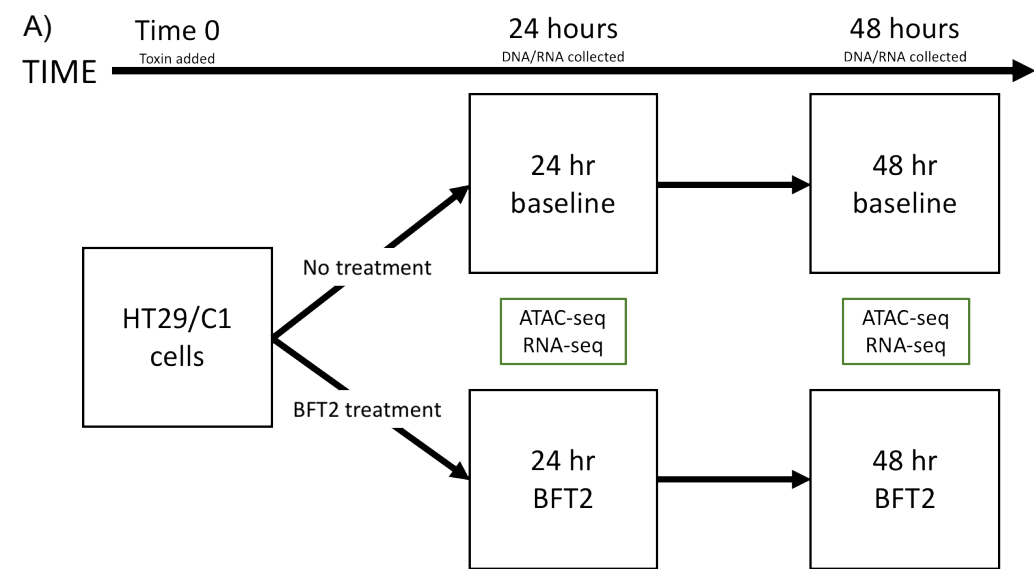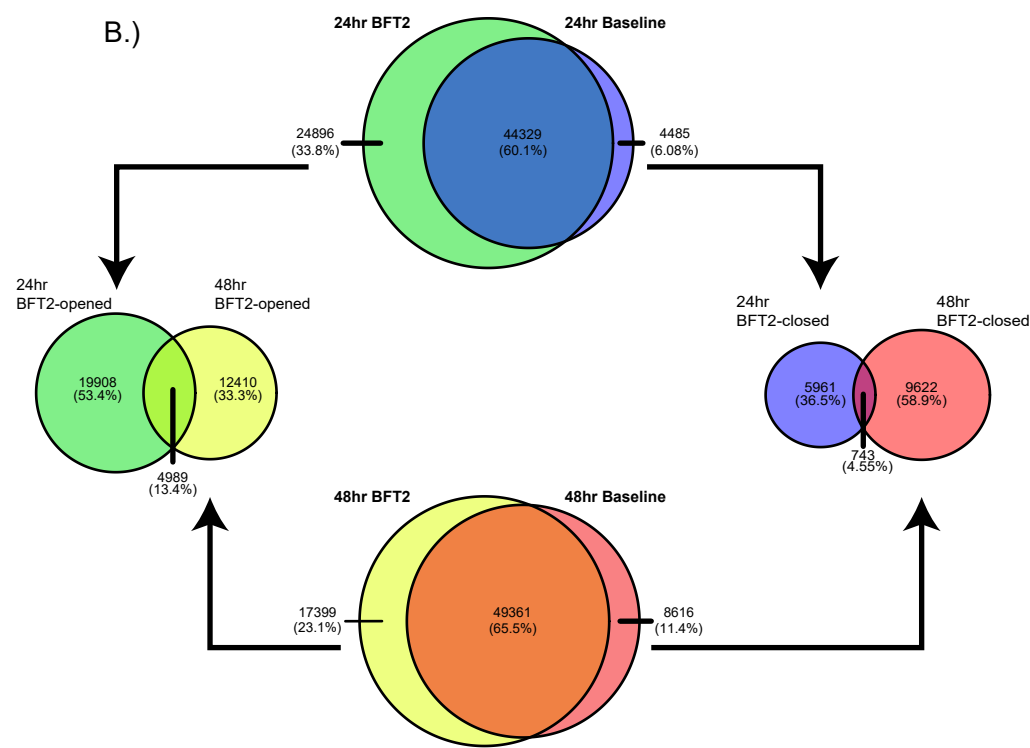

# 24 Hours

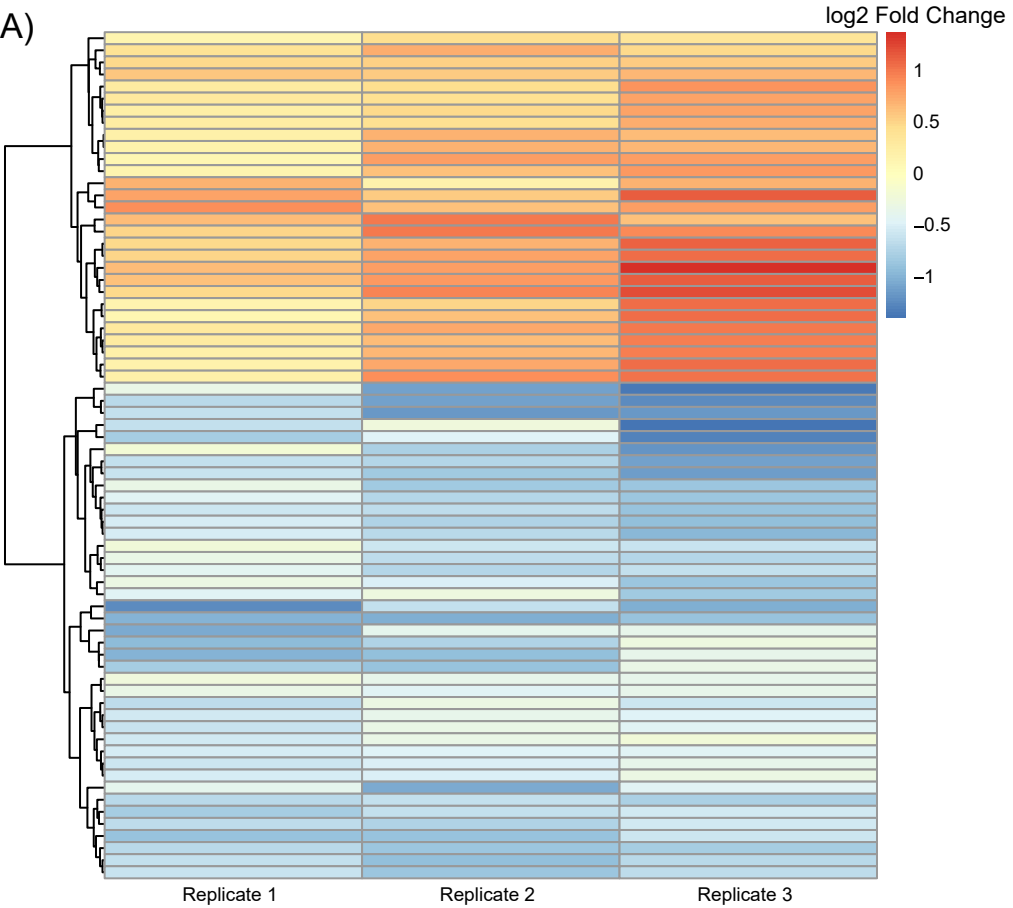

# 48 Hours

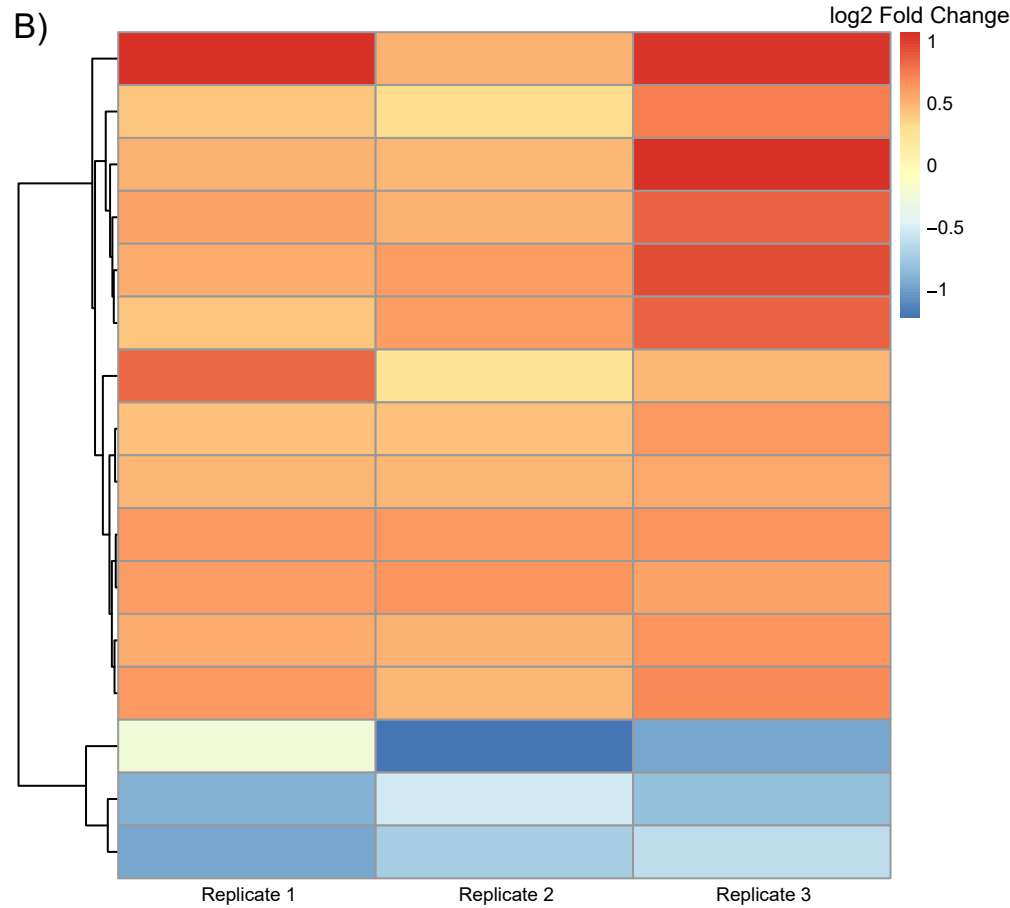

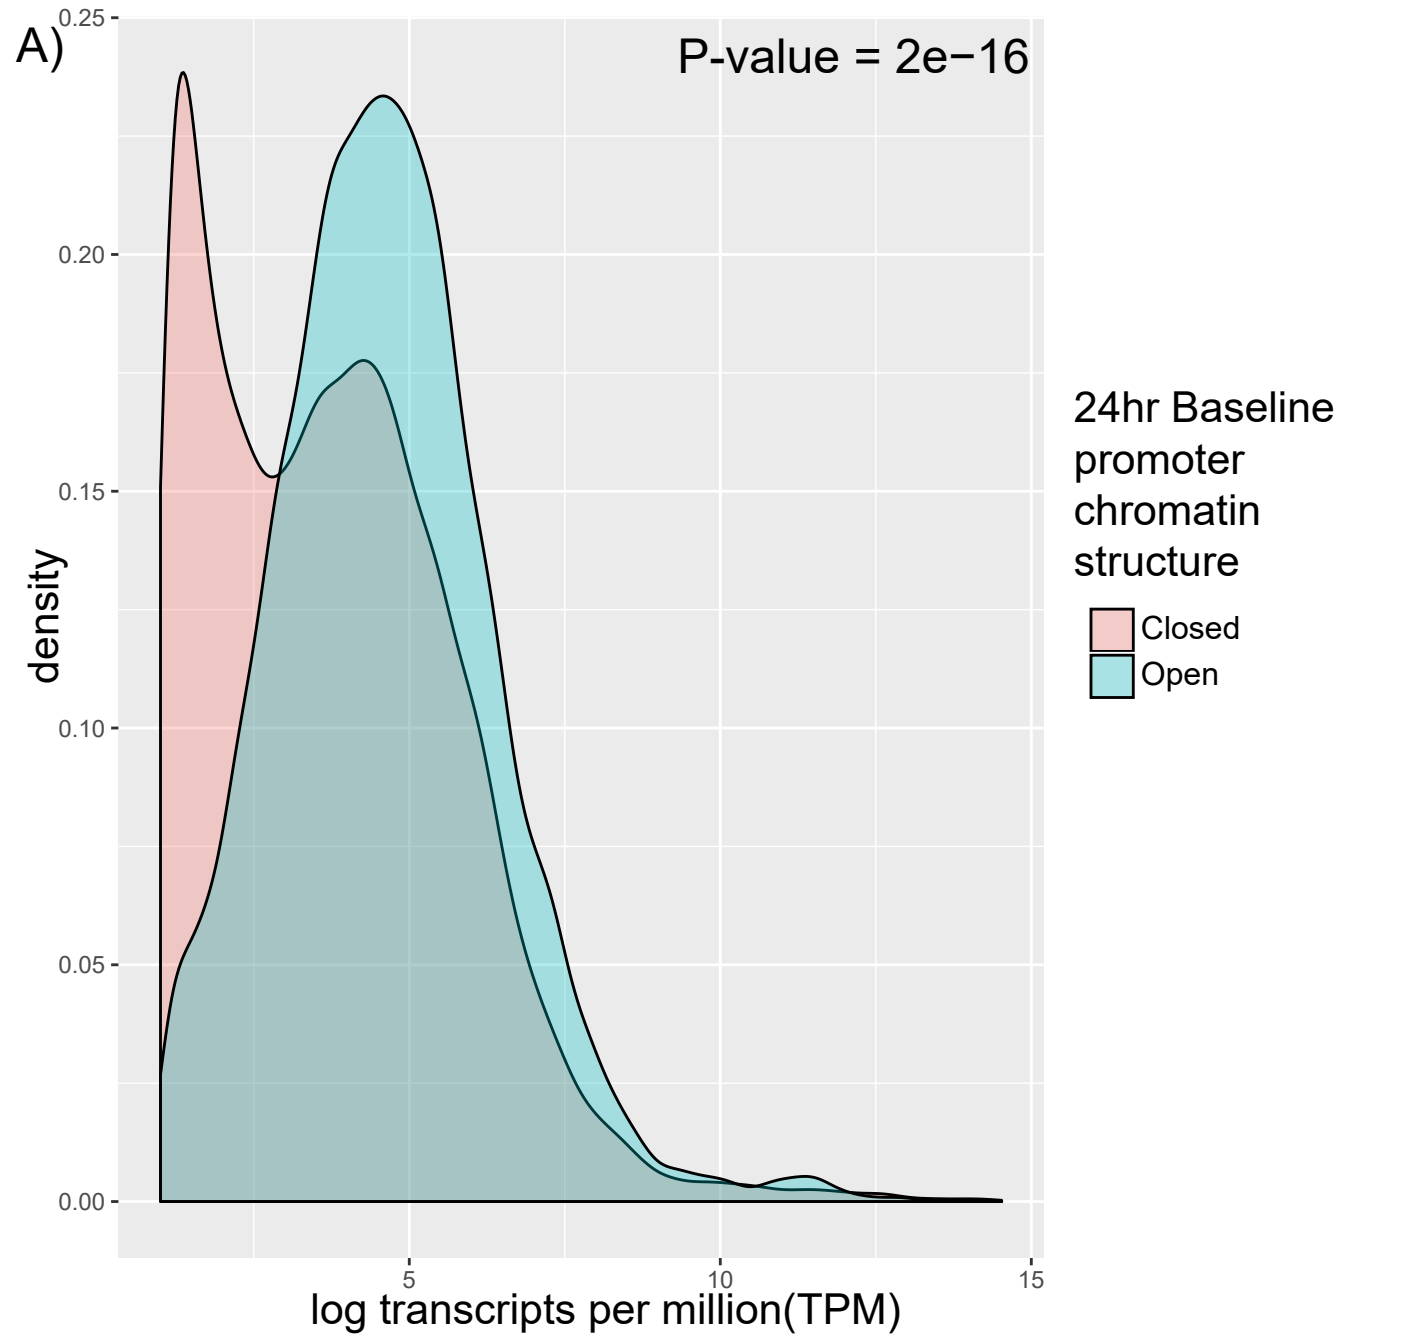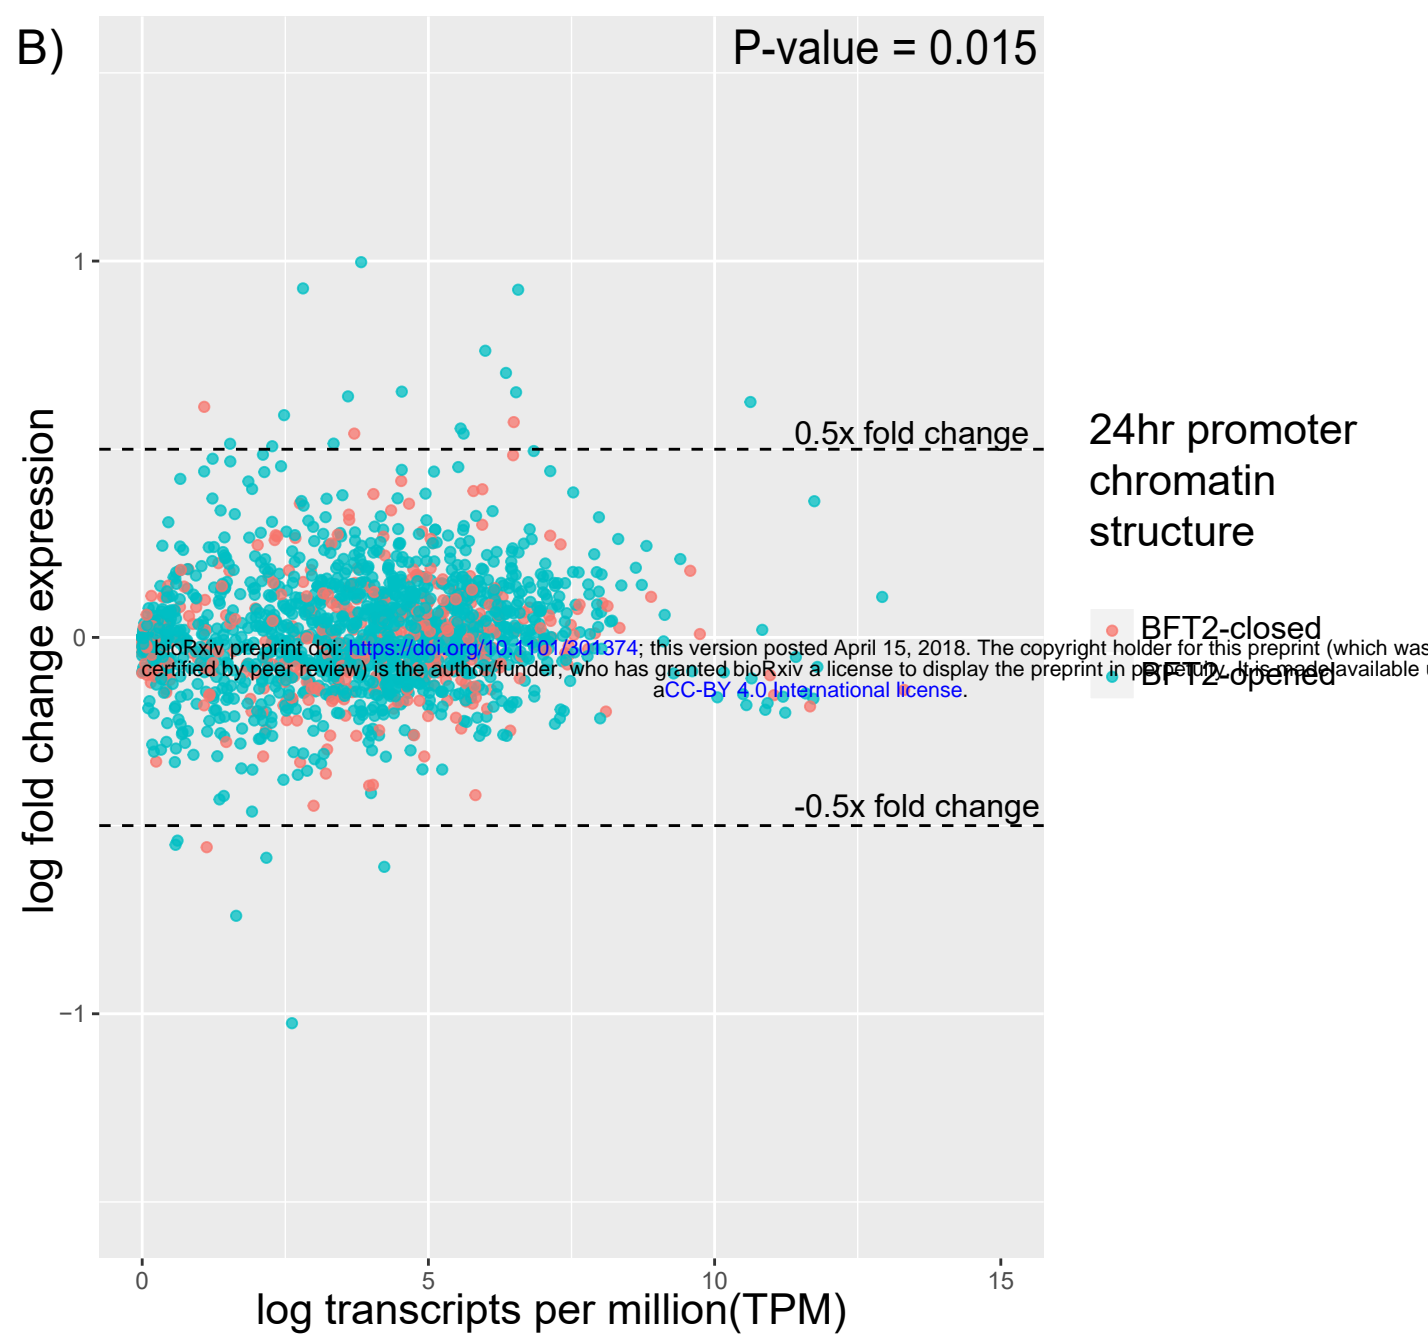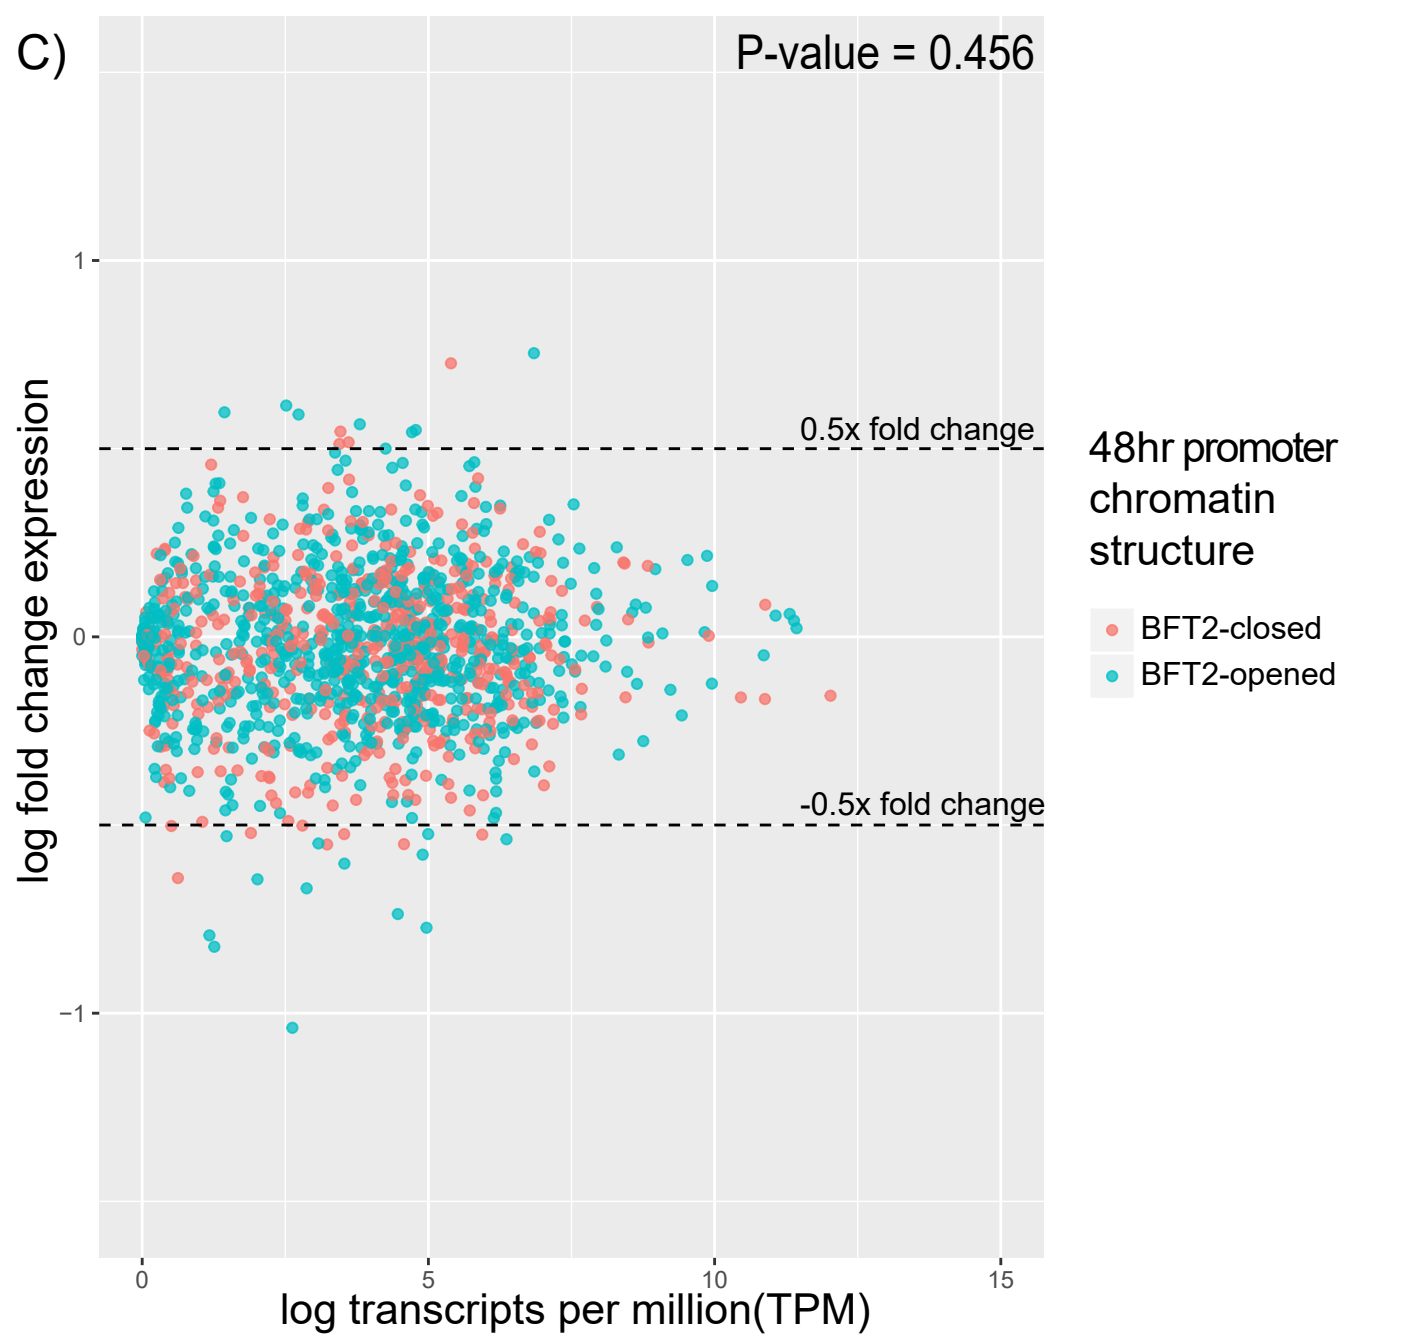

Source: https://www.biorxiv.org/content/10.1101/301374v1.full.pdf
